# Supplementary material for: Diversity analyses of bacterial symbionts in four Sclerodermus (Hymenoptera: Bethylidae) parasitic wasps, the dominant biological control agents of wood-boring beetles in China
Source: Front Cell Infect Microbiol. 2024 Jul 25;14:1439476. doi: 10.3389/fcimb.2024.1439476 (PMC11306144; doi:10.3389/fcimb.2024.1439476)
Supplement: Supplementary file 2 [file Table_1.xlsx]

## Sheet: Table S1
Table S1 The compositions of the symbiotic bacterial communities of the four wasp species
Genus	SP	SS	SG	SH	p-value
Bacteroides	20.4377	14.6295	20.9268	22.0179	0.215873
Wolbachia	0.0545833	51.4048	2.3095	0.00145	0.000658855
Enterococcus	5.44245	3.84673	6.5574	7.77875	0.0856369
Parabacteroides	4.13887	2.33045	6.58994	5.67135	0.00657625
Blautia	3.57515	1.15287	4.91498	6.04392	0.00321307
Bacillus	10.5319	0.318533	1.23386	0.8304	0.0136082
Anaerostipes	2.45205	0.937267	1.83212	3.1539	0.0050265
Escherichia-Shigella	2.20767	0.7161	2.0663	3.16047	0.00417375
Acinetobacter	1.84757	0.663433	2.71298	2.1678	0.00988649
Streptococcus	2.53085	0.72235	1.194	1.7685	0.108617
